# Supplementary material for: Karyotype Diversity, Mode, and Tempo of the Chromosomal Evolution of Attina (Formicidae: Myrmicinae: Attini): Is There an Upper Limit to Chromosome Number?
Source: MDPI journal article supplement (doi:10.3390/insects12121084), 2021-12-02
Supplement: s1 [file s1]

Table S1: Models of molecular evolution by genes and codons

| Gene (number of base pairs)                | Position              | Model |
|--------------------------------------------|-----------------------|-------|
| <b><i>wingless</i></b>                     | 1st – first position  | TRN+I |
|                                            | 2nd – second position | TRN+I |
|                                            | 3rd – third position  | TRN+G |
| <b><i>elongation factor-1 alpha F1</i></b> | 1st – first position  | TRN+I |
|                                            | 2nd – second position | HKY+I |
|                                            | 3rd – third position  | TRN+G |
| <b><i>elongation factor-1 alpha F2</i></b> | 1st – first position  | TRN+I |
|                                            | 2nd – second position | HKY+I |
|                                            | 3rd – third position  | TRN+G |
| <b><i>long-wavelength rhodopsin</i></b>    | 1st – first position  | HKY+I |
|                                            | 2nd – second position | F81+I |
|                                            | 3rd – third position  | TRN+G |
| <b><i>topoisomerase I</i></b>              | 1st – first position  | TRN+I |
|                                            | 2nd – second position | HKY+I |
|                                            | 3rd – third position  | HKY+I |
