# Supplementary material for: Karyotype Diversity, Mode, and Tempo of the Chromosomal Evolution of Attina (Formicidae: Myrmicinae: Attini): Is There an Upper Limit to Chromosome Number?
Source: Insects. 2021 Dec 2;12(12):1084. doi: 10.3390/insects12121084 (PMC8707115; doi:10.3390/insects12121084)
Supplement: Supplementary file 1 [file insects-12-01084-s001.zip]

Archive with 4 entries (4 files):
- FigS1.pdf
- __MACOSX/._FigS1.pdf
- tableS1.pdf
- __MACOSX/._tableS1.pdf
