# Supplementary figures and images for: Karyotype Diversity, Mode, and Tempo of the Chromosomal Evolution of Attina (Formicidae: Myrmicinae: Attini): Is There an Upper Limit to Chromosome Number?
Source: MDPI journal article supplement (doi:10.3390/insects12121084), 2021-12-02

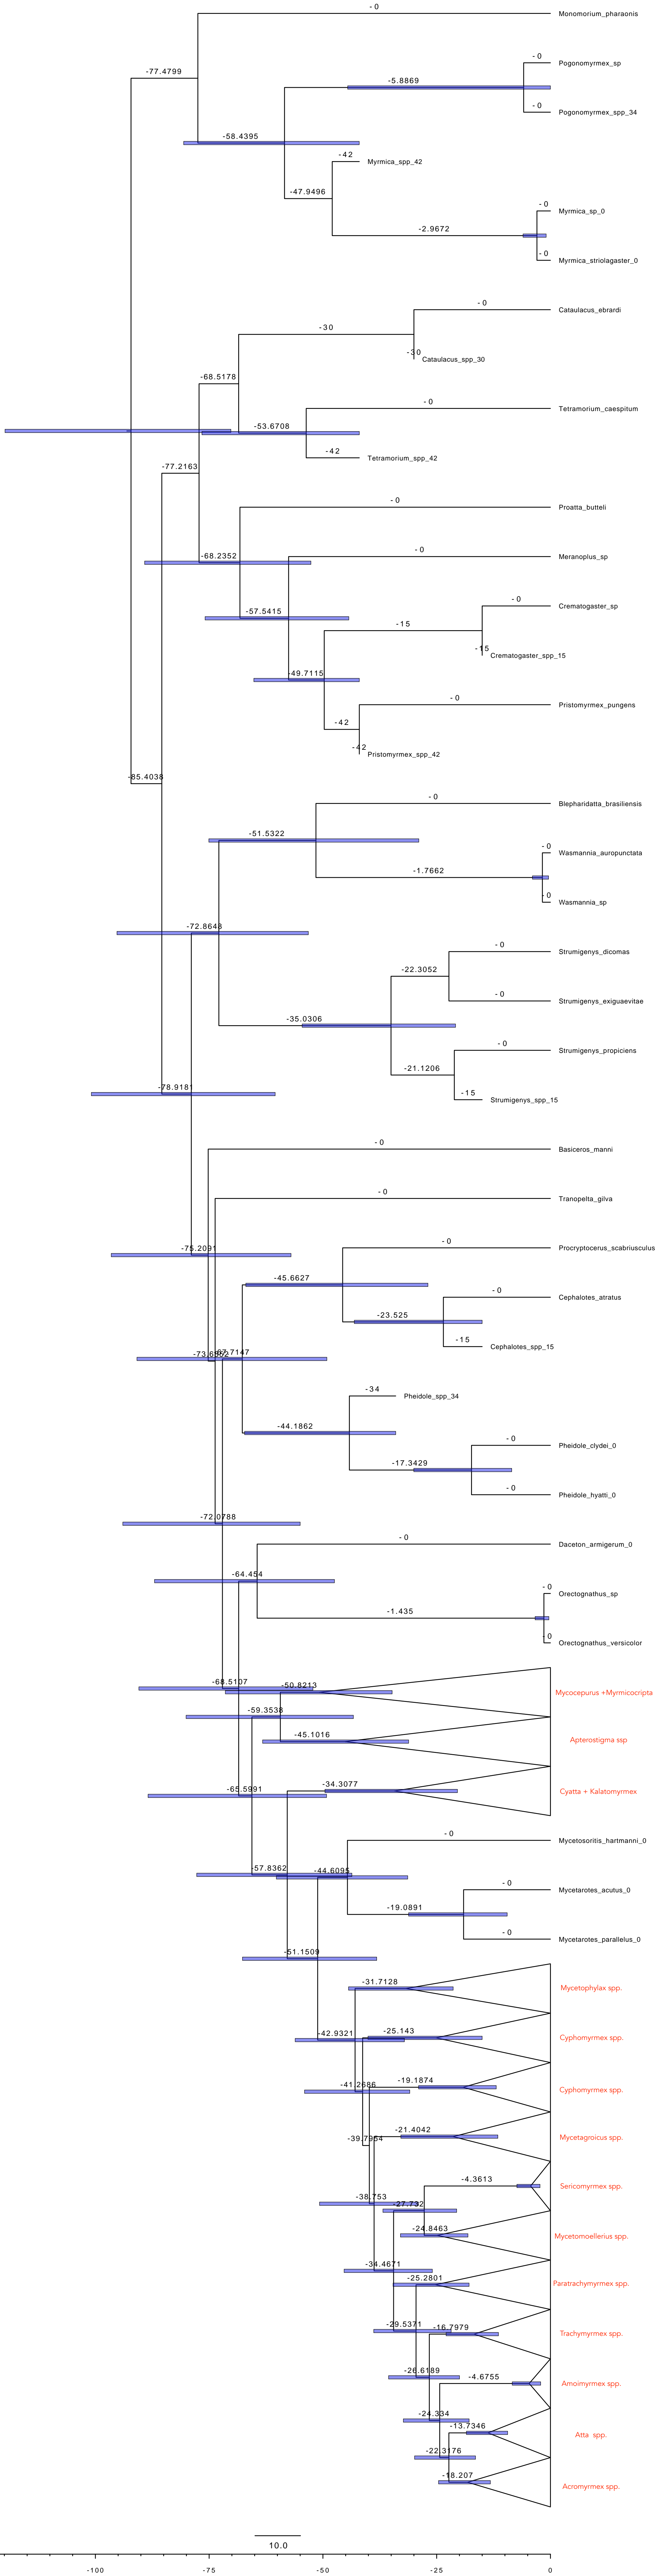

Supplement: s1 [file s1]
